# Supplementary material for: Nanoscopic Characterization of Starch Biofilms Extracted from the Andean Tubers Ullucus tuberosus, Tropaeolum tuberosum, Oxalis tuberosa, and Solanum tuberosum
Source: MDPI journal article supplement (doi:10.3390/polym14194116), 2022-10-01
Supplement: s1 [file s1]

Supplementary

# Nanoscopic Characterization of Starch Biofilms Extracted from the Andean Tubers *Ullucus tuberosus*, *Tropaeolum tuberosum*, *Oxalis tuberosa*, and *Solanum tuberosum*

Cynthia Pico <sup>1,†</sup>, Jhomara De la Vega <sup>2,†</sup>, Irvin Tubón <sup>1</sup>, Mirari Arancibia <sup>1,2</sup> and Santiago Casado <sup>1,\*</sup>

<sup>1</sup> Food and Biotechnology Science and Engineering Department, Technical University of Ambato, Ambato 180207, Ecuador

<sup>2</sup> Isabrubotanik S.A., Ambato 180150, Ecuador

\* Correspondence: s.casado@uta.edu.ec; Tel.: +593-2400987 (ext. 5509)

† These authors contributed equally to this work.

**Citation:** Pico, C.; De la Vega, J.; Tubón, I.; Arancibia, M.; Casado, S. Nanoscopic Characterization of Starch Biofilms Extracted from the Andean Tubers *Ullucus tuberosus*, *Tropaeolum tuberosum*, *Oxalis tuberosa*, and *Solanum tuberosum*. *Polymers* **2022**, *14*, 4116. <https://doi.org/10.3390/polym14194116>

Academic Editor: Vincent Chan

Received: 30 August 2022

Accepted: 26 September 2022

Published: 1 October 2022

**Publisher's Note:** MDPI stays neutral with regard to jurisdictional claims in published maps and institutional affiliations.

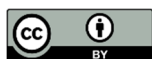

**Copyright:** © 2022 by the authors. Submitted for possible open access publication under the terms and conditions of the Creative Commons Attribution (CC BY) license (<https://creativecommons.org/licenses/by/4.0/>).

## Supplementary Materials:

### S.3.1. Macroscopic optical differences between films containing mouthwash

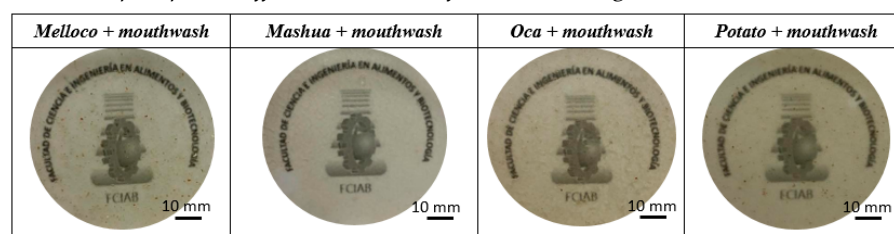

**Figure S1.** Visual appearance and apparent transparency of starch films with mouthwash extracted from each of the Andean tubers analyzed.

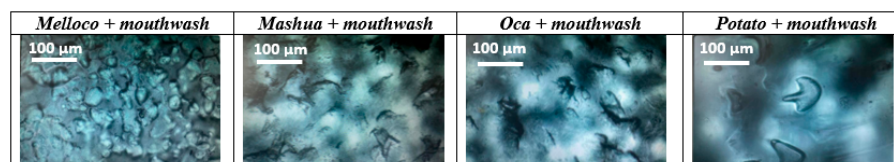

**Figure S2.** Micrographs of starch films extracted from each of the Andean tubers analyzed, after addition of a mouthwash to each one, in reflection using white light transmission illumination.

### S.3.2. Nanoscopic characterization

#### S.3.2.1. Topography

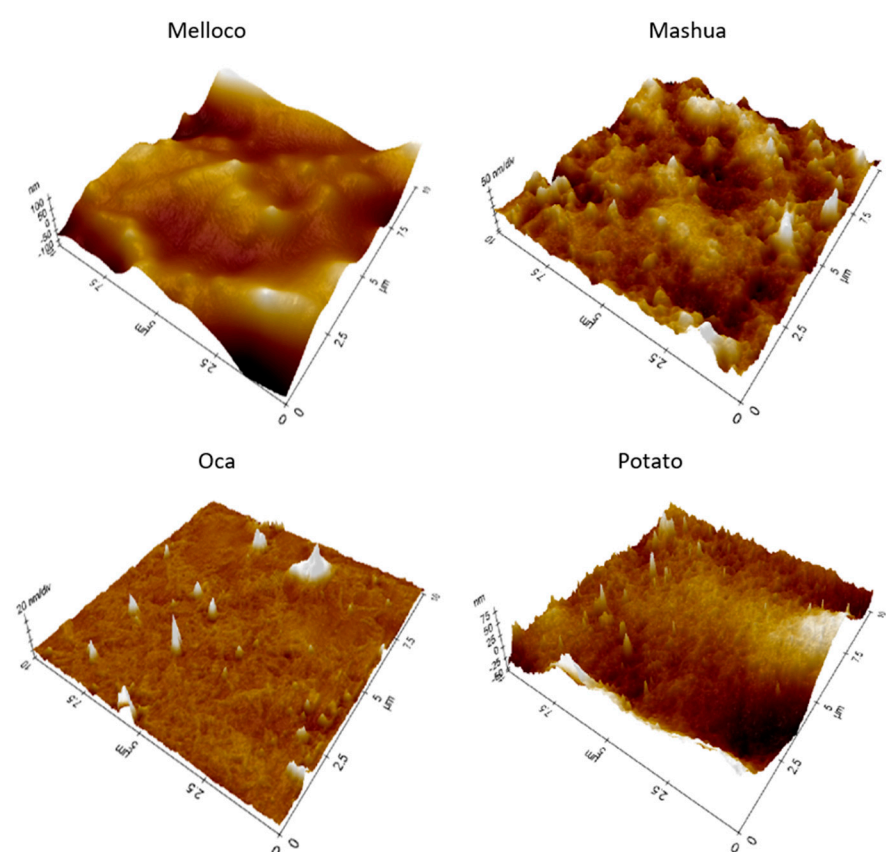

**Figure S3.** Atomic Force Microscopy topography 3D images of 10 × 10 μm<sup>2</sup> range.

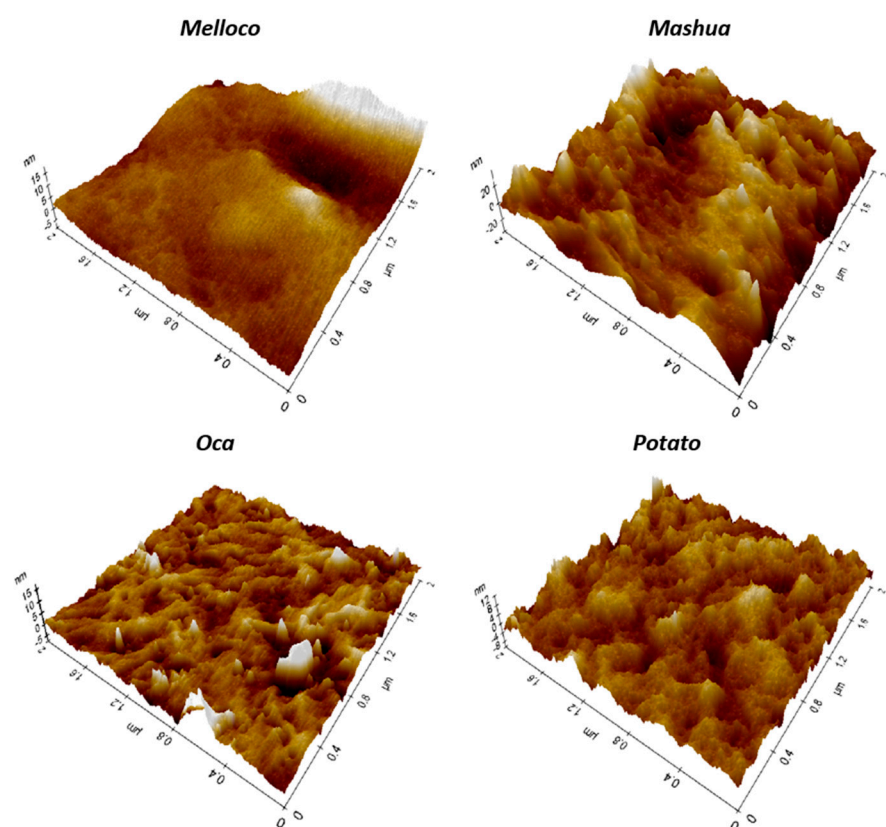

**Figure S4.** Atomic Force Microscopy topography 3D images of 2 × 2 μm<sup>2</sup> range.

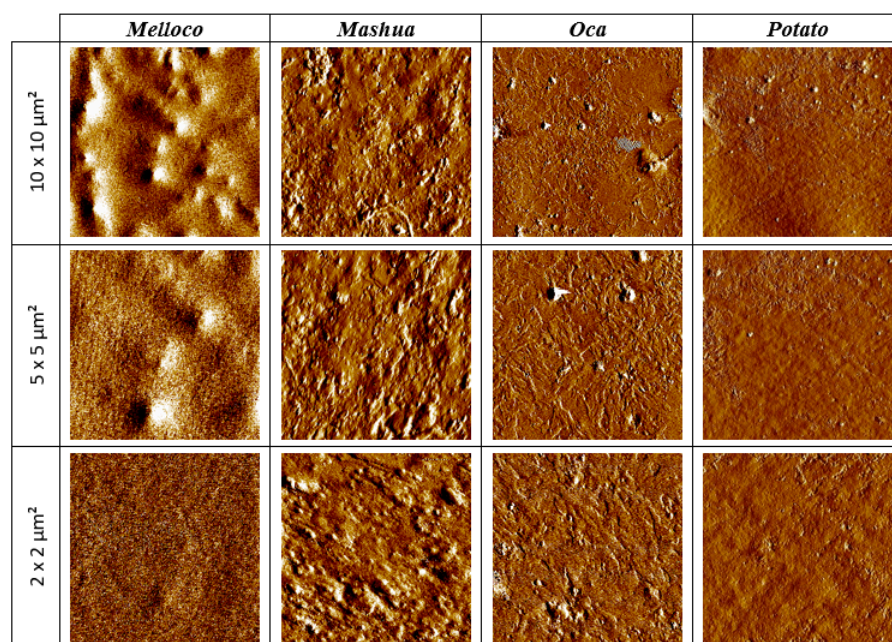

**Figure S5.** Atomic Force Microscopy amplitude (lock-in, error signal) measured in tapping mode on the surface of biofilms extracted from the Andean tubers mellico, mashua, oca, and potato, at different scan areas.
